# Supplementary material for: Development of a Methodology for Determination of Dioxins and Dioxin-like PCBs in Meconium by Gas Chromatography Coupled to High-Resolution Mass Spectrometry (GC-HRMS)
Source: MDPI journal article supplement (doi:10.3390/molecules28135006), 2023-06-26
Supplement: s1 [file s1]

# Supplementary Materials: Development of a methodology for determination of dioxins and dioxin-like PCBs in meconium by gas chromatography coupled to high-resolution mass spectrometry (GC-HRMS)

Iñaki Lacomba <sup>1,2</sup>, Antonio López <sup>1</sup>, Raquel Hervàs-Ayala <sup>3</sup> and Clara Coscollà <sup>1,\*</sup>

<sup>1</sup> Foundation for the Promotion of Health and Biomedical Research of the Valencian Region, FISABIO-Public Health, Av. Catalunya, 21, 46020 Valencia, Spain

<sup>2</sup> Department of Analytical Chemistry, Univeristy of Valencia, Doctor Moliner 50, 46100 Burjassot, Spain

<sup>3</sup> Department of Obstetrics and Gynaecology, General University Hospital of Valencia, Valencia, Spain

\* Correspondence: coscolla\_cla@gva.es; Tel.: +34961926333

## Table of Contents

| Type     | Captions                                                                                        | Page |
|----------|-------------------------------------------------------------------------------------------------|------|
| Table S1 | Overview of extraction and clean-up methods in the analysis of PCDD/Fs and dl-PCBs in meconium. | S3   |

**Table S1.** Overview of extraction and clean-up methods in the analysis of PCDD/Fs and dl-PCBs in meconium.

| References                    | Country | Extraction method                                                                                 | Clean-up                                                                                                                                                                                                                 | Sample amount (g) | Analysis Technique | Common Compounds                                             |
|-------------------------------|---------|---------------------------------------------------------------------------------------------------|--------------------------------------------------------------------------------------------------------------------------------------------------------------------------------------------------------------------------|-------------------|--------------------|--------------------------------------------------------------|
| Fernandez-Cruz et al., 2020   | Spain   | SPLE (ACN <sup>a</sup> )                                                                          | Dual-layer SPE EZ-POP cartridges                                                                                                                                                                                         | 0.5               | GC-QqQ-MS/MS       | PCB 77, 81, 105, 114, 118, 123, 126, 156, 157, 167, 169, 189 |
| Morokuma et al., 2017         | Japan   | Not specified                                                                                     | Not specified                                                                                                                                                                                                            | 5                 | HRGC-MS            | 7 PCDD, 10 PCDF, 4 PCB                                       |
| Jeong et al., 2016            | Korea   | Soxhlet extraction (DCM <sup>b</sup> :HX <sup>c</sup> (3:1))                                      | Multi-layered SPE containing anhydrous Na <sub>2</sub> SO <sub>4</sub> , silica, 22% (w/w) H <sub>2</sub> SO <sub>4</sub> -silica gel, 44% (w/w) H <sub>2</sub> SO <sub>4</sub> -silica gel, and 2% (w/w) KOH-silica gel | 0.5-1.5           | HRGC-HRMS          | PCB 118                                                      |
| Veyhe et al., 2013            | Norway  | Solid-Liquid extraction (H <sub>2</sub> SO <sub>4</sub> + HX <sup>c</sup> ) vortex and ultrasonic | SPE automated cleaning using Florisil                                                                                                                                                                                    | 0.5-0.7           | GC-MS              | PCB 118, 156                                                 |
| Álvarez-Silvares et al., 2021 | Spain   | SPLE (ACN <sup>a</sup> )                                                                          | Dual-layer SPE EZ-POP cartridges                                                                                                                                                                                         | 0.5               | GC-QqQ-MS/MS       | PCB 118, 77, 126, 156, 157, 81, 105, 114, 167, 169, 189      |

<sup>a</sup>ACN: acetonitrile<sup>b</sup>DCM: dichloromethane<sup>c</sup>HX: hexane
